# Supplementary material for: RETRACTED ARTICLE: RNA m6A methylation regulates the epithelial mesenchymal transition of cancer cells and translation of Snail
Source: PubMed Central journal article supplement (PMC6502834; doi:10.1038/s41467-019-09865-9), 2019-05-06
Supplement: 41467_2019_9865_MOESM1_ESM.pdf [file 41467_2019_9865_MOESM1_ESM.pdf]

1 **Supplementary data for**  
2 **RNA m<sup>6</sup>A methylation regulates the epithelial mesenchymal**  
3 **transition of cancer cells and translation of Snail**

4

5 **Lin et al**

6

7

8 **Supplementary Figures**

9 **Supplementary Figure 1**

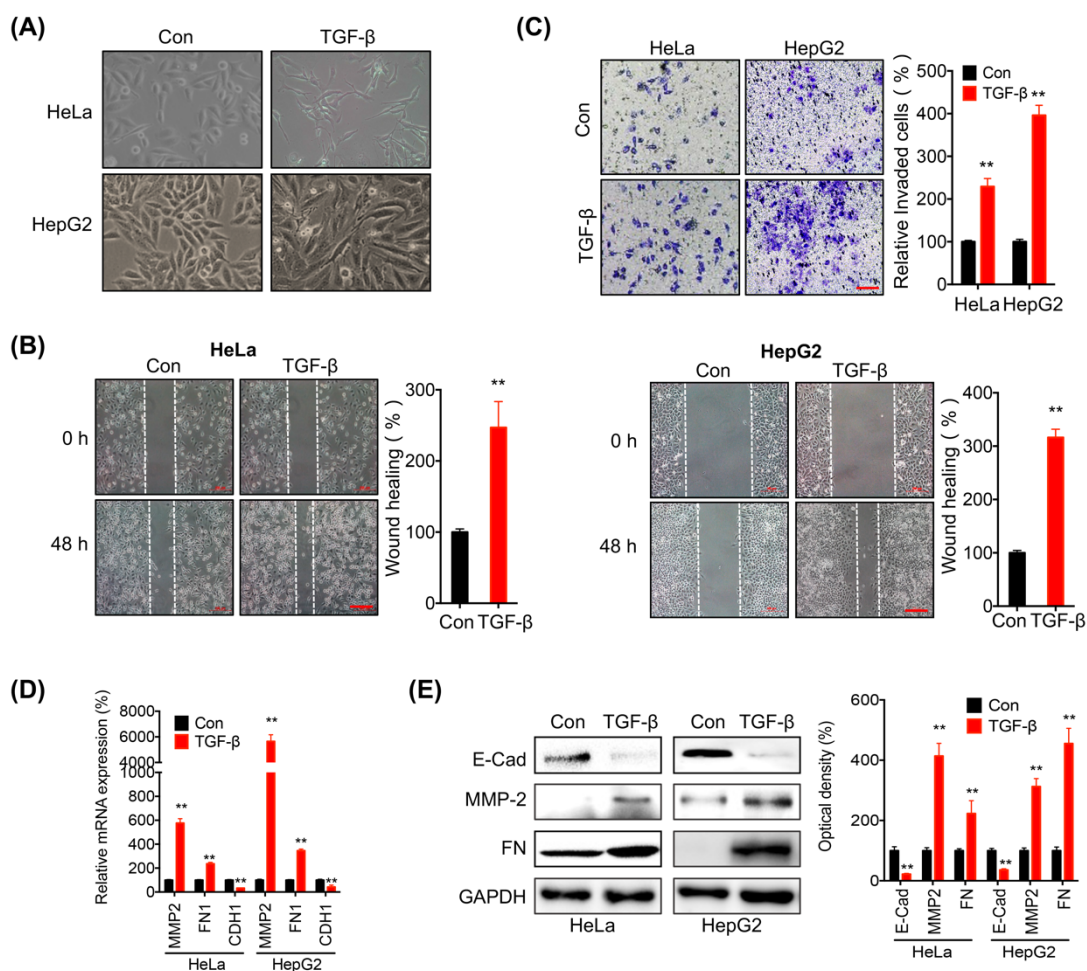

10

11 **Supplementary Figure 1 Establishment of EMT models of cancer cells by TGF-β**  
 12 **treatment.**

13 (A) HeLa and HepG2 cells were treated with or without 10 ng/ml TGF-β for 3 days, the  
 14 phenotypic changes of cells were recorded by phase contrast microscope;

15 (B) HeLa or HepG2 cells were treated with or without 10 ng/ml TGF-β for 48 h, wound healing  
 16 was recorded (*left*) and quantitatively analyzed (*right*);

17 (C) The *in vitro* invasion of HeLa or HepG2 cells treated with or without 10 ng/ml TGF-β for  
 18 24 h were tested by use of CytoSelect™ 24-well Cell Invasion assay kits (8 μm,  
 19 colorimetric format);

20 (D & E) HeLa or HepG2 cells treated with or without 10 ng/ml TGF-β for 24h (D) or 48h (E),  
 21 the mRNA and protein levels of MMP-2, FN (*FNI*) and E-Cad (CDH1) were measured by

22 qRT-PCR and western blot analysis, respectively.

23 Data are presented as means  $\pm$  SD from three independent experiments. \* $p$ <0.05, \*\* $p$ < 0.01

24 compared with control, by Student's  $t$  test.

25 Related to Figure 1

26

27 **Supplementary Figure 2**

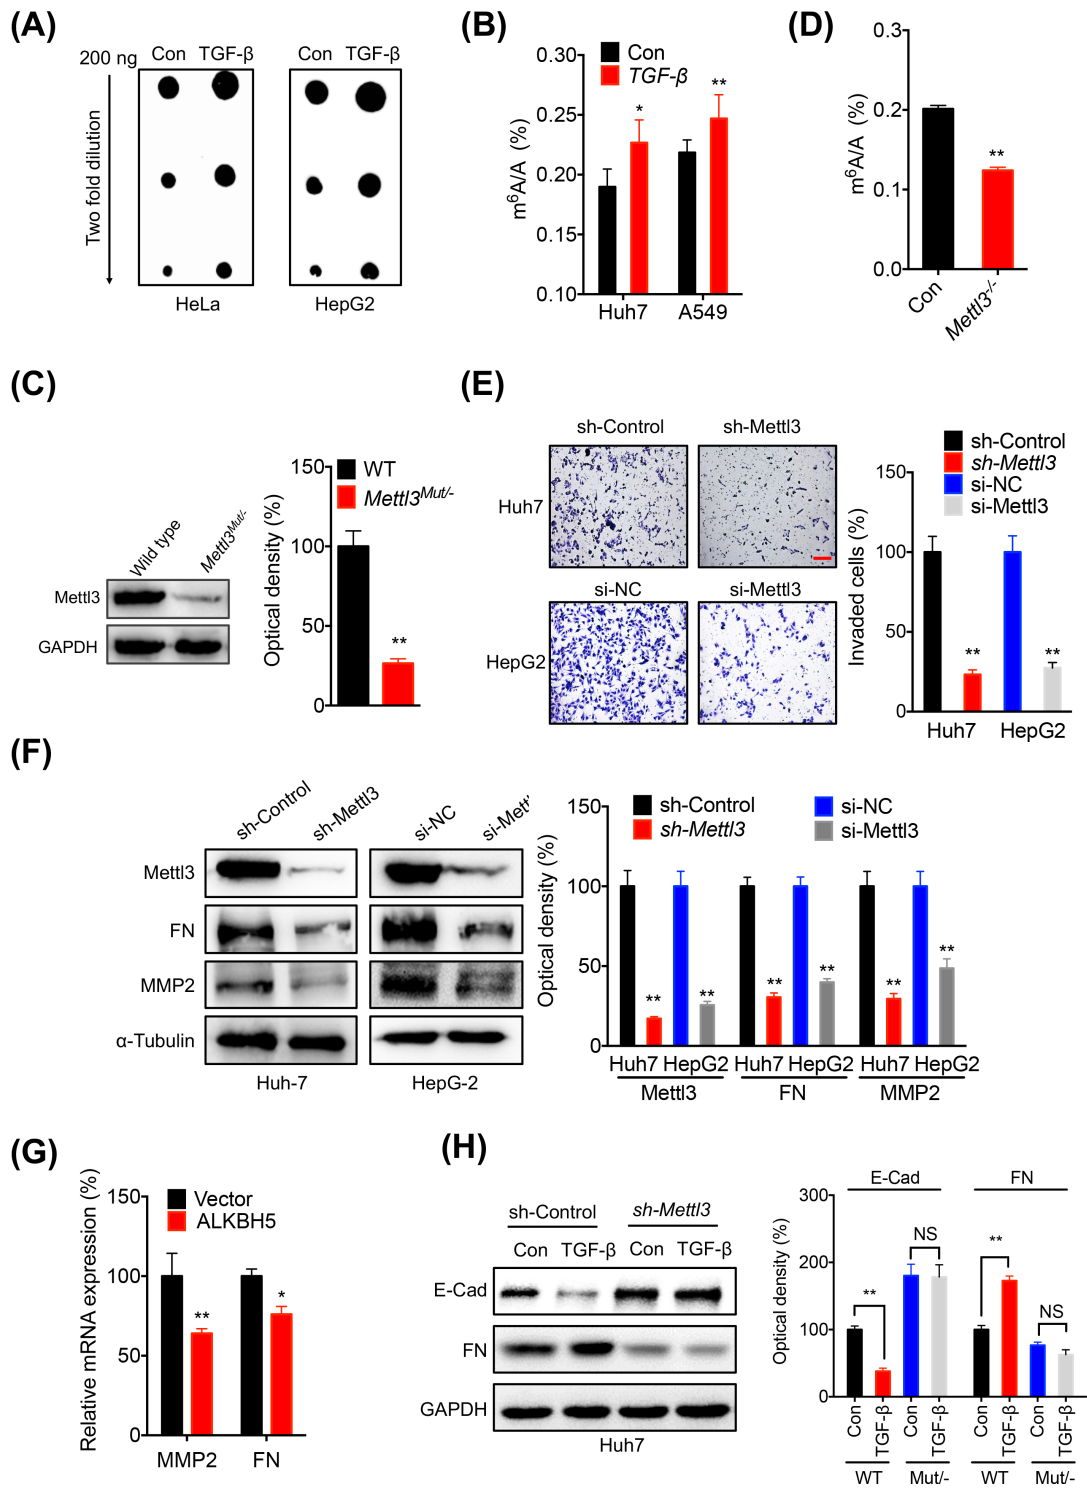

28

29 **Supplementary Figure 2 EMT of cancer cells is regulated by m<sup>6</sup>A levels of mRNAs.**

30 (A) Dot-blot analysis of m<sup>6</sup>A levels in total mRNA of HeLa and HepG2 cells treated with or

31 without 10 ng/ml TGF-β for 3 days;

- 32 (B) Cells were treated with or without 10 ng/ml TGF- $\beta$  for 3 days, the m<sup>6</sup>A/A ratio of total  
33 mRNA were determined by LC-MS/MS;
- 34 (C) The protein expression of METTL3 in wide type and *Mettl3*<sup>Mut/-</sup> HeLa cells;
- 35 (D) The m<sup>6</sup>A/A ratio of total mRNA in wide type and *Mettl3*<sup>Mut/-</sup> HeLa cells;
- 36 (E) Cells were allowed to invade for 24 h and tested by CytoSelect™ 24-well Cell Invasion  
37 assay kits (8  $\mu$ m, colorimetric format);
- 38 (F) The protein expression in sh-Control and sh-Mettl3 Huh7 cells or si-NC and si-Mettl3  
39 transfected HepG2 cells was determined by western blot analysis (*left*) and quantitatively  
40 analyzed (*right*);
- 41 (G) HeLa cells were transfected with pcDNA (vector) or pcDNA/ALKBH5 for 24 h, the  
42 mRNA levels of MMP-2 and FN were measured by qRT-PCR;
- 43 (H) The sh-Control and sh-Mettl3 Huh7 cells were treated with or without 10 ng/ml TGF- $\beta$  for  
44 3 days, protein expression was determined by western blot analysis (*left*) and quantitatively  
45 analyzed (*right*).

46 Data are presented as means  $\pm$  SD from three independent experiments. \* $p$ <0.05, \*\* $p$ < 0.01;  
47 NS, no significant, by Student's *t* test.

48 Related to Figure 1

49

50

51

52 **Supplementary Figure 3**

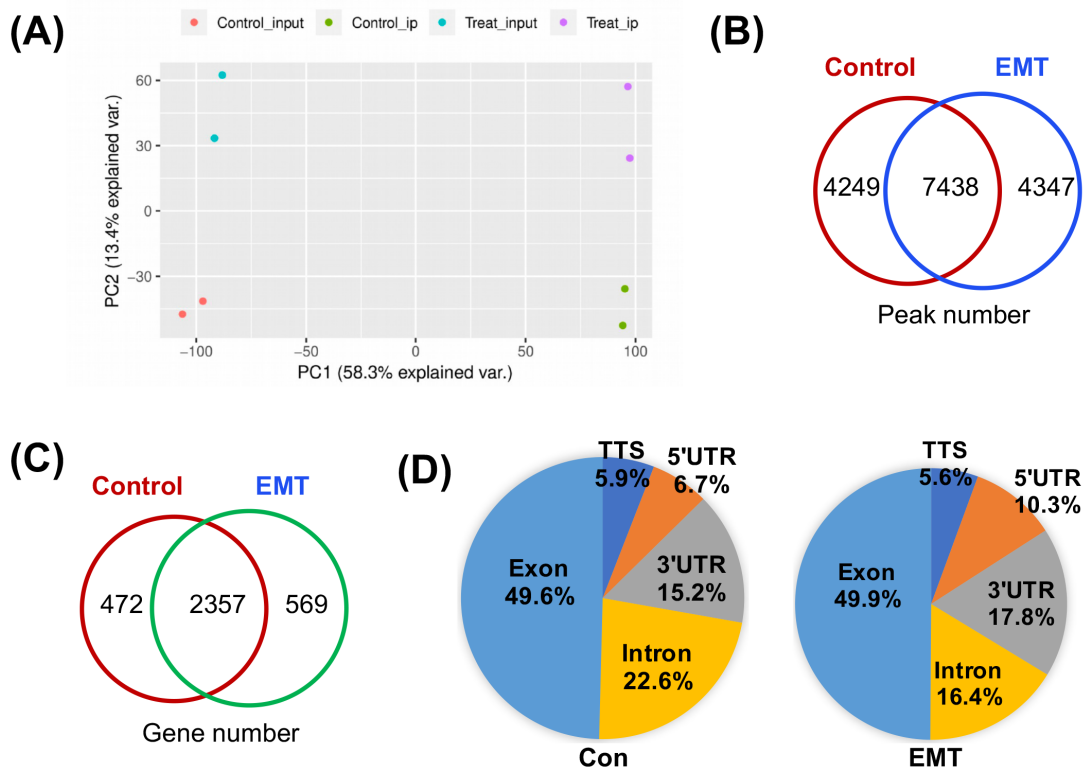

53

54 **Supplementary Figure 3 Characterization of m<sup>6</sup>A-regulated genes in cancer cells**  
55 **undergoing EMT.**

56 (A) PCA results for the expression levels of all genes from 8 samples;

57 (B) Number of m<sup>6</sup>A peaks identified in m<sup>6</sup>A-seq from control and EMT cells;

58 (C) Number of m<sup>6</sup>A modified genes identified in m<sup>6</sup>A-seq. Common m<sup>6</sup>A genes contain at least  
59 one common m<sup>6</sup>A peak, while unique m<sup>6</sup>A genes contain no common m<sup>6</sup>A peaks;

60 (D) The proportion of m<sup>6</sup>A peak distributions in the 5'UTR, start codon, CDS, stop codon or  
61 3'UTR region across the entire set of mRNA transcripts;

62 Related to Figure 2

63

64

65

66

67 **Supplementary Figure 4**

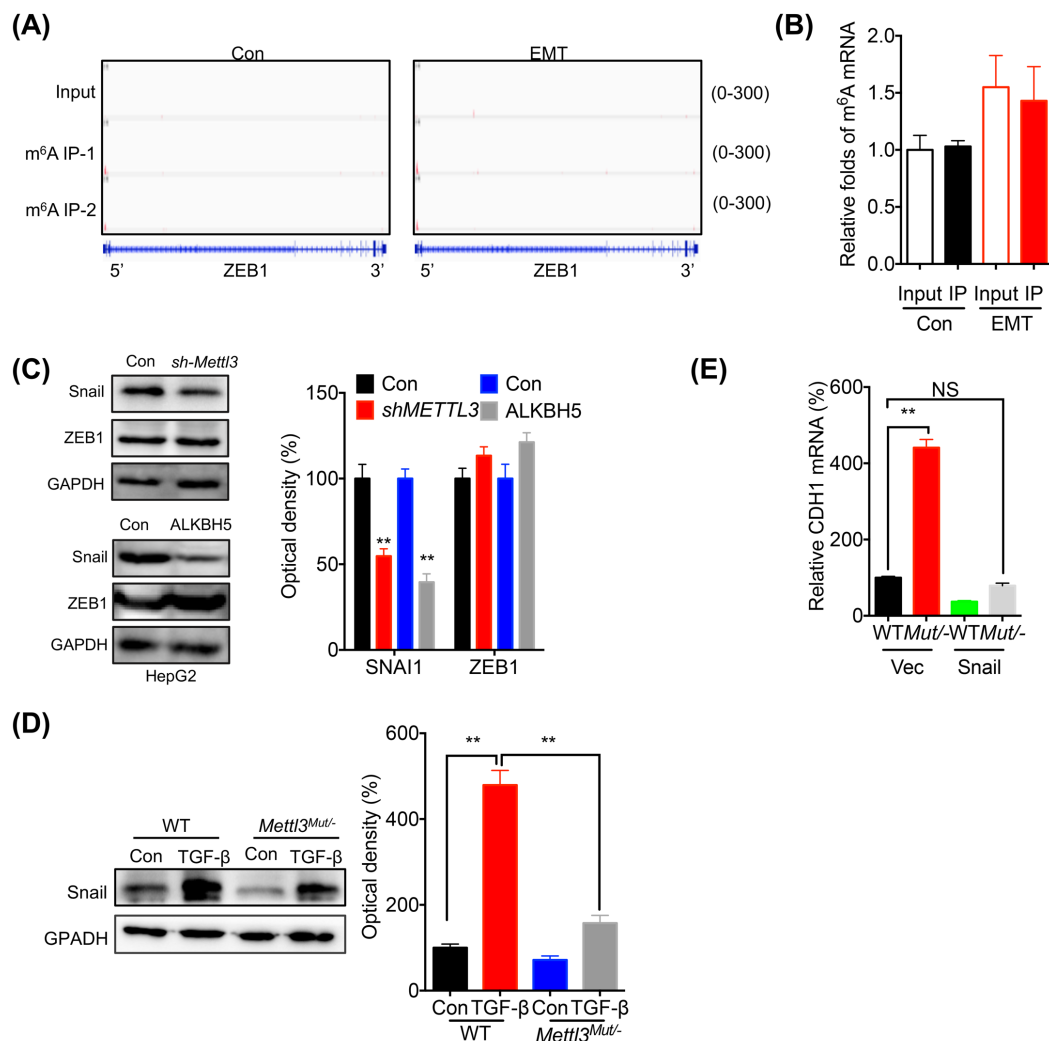

68

69 **Supplementary Figure 4 SNAIL1 is involved in m<sup>6</sup>A-regulated EMT in cancer cells.**

70 (A) ZEB1 mRNA acted as negative control, without m<sup>6</sup>A peak in its mRNA neither in control  
71 nor HeLa cells undergoing EMT. Data was obtained from m<sup>6</sup>A RIP-seq;

72 (B) The m<sup>6</sup>A RIP-qPCR analysis of ZEB1 mRNA in control and EMT undergoing HeLa cells;

73 (C) The protein expression of Snail in *si-METTL3* or AKBH5 transfected (24 h) HepG2 and  
74 control cells was determined by western blot analysis (*left*) and quantitatively analyzed  
75 (*right*);

76 (D) Wild type or *Mettl3<sup>Mut/-</sup>* HeLa cells were treated with or without 10 ng/ml TGF- $\beta$  for 48 h,  
77 the expression of Snail was detected by western blot analysis (*left*) and quantitatively

78 analyzed (*right*);

79 (E) The mRNA expression of CDH1 (E-Cad) in wild type or *Mettl3*<sup>Mut/-</sup> HeLa cells transfected  
80 with or without pcDNA/Snail for 48 h.

81 Data are presented as means  $\pm$  SD from three independent experiments. \*\* $p < 0.01$ , NS, no  
82 significant, by one-way ANOVA with Bonferroni test.

83 Related to Figure 3

84

85



86 **Supplementary Figure 5**

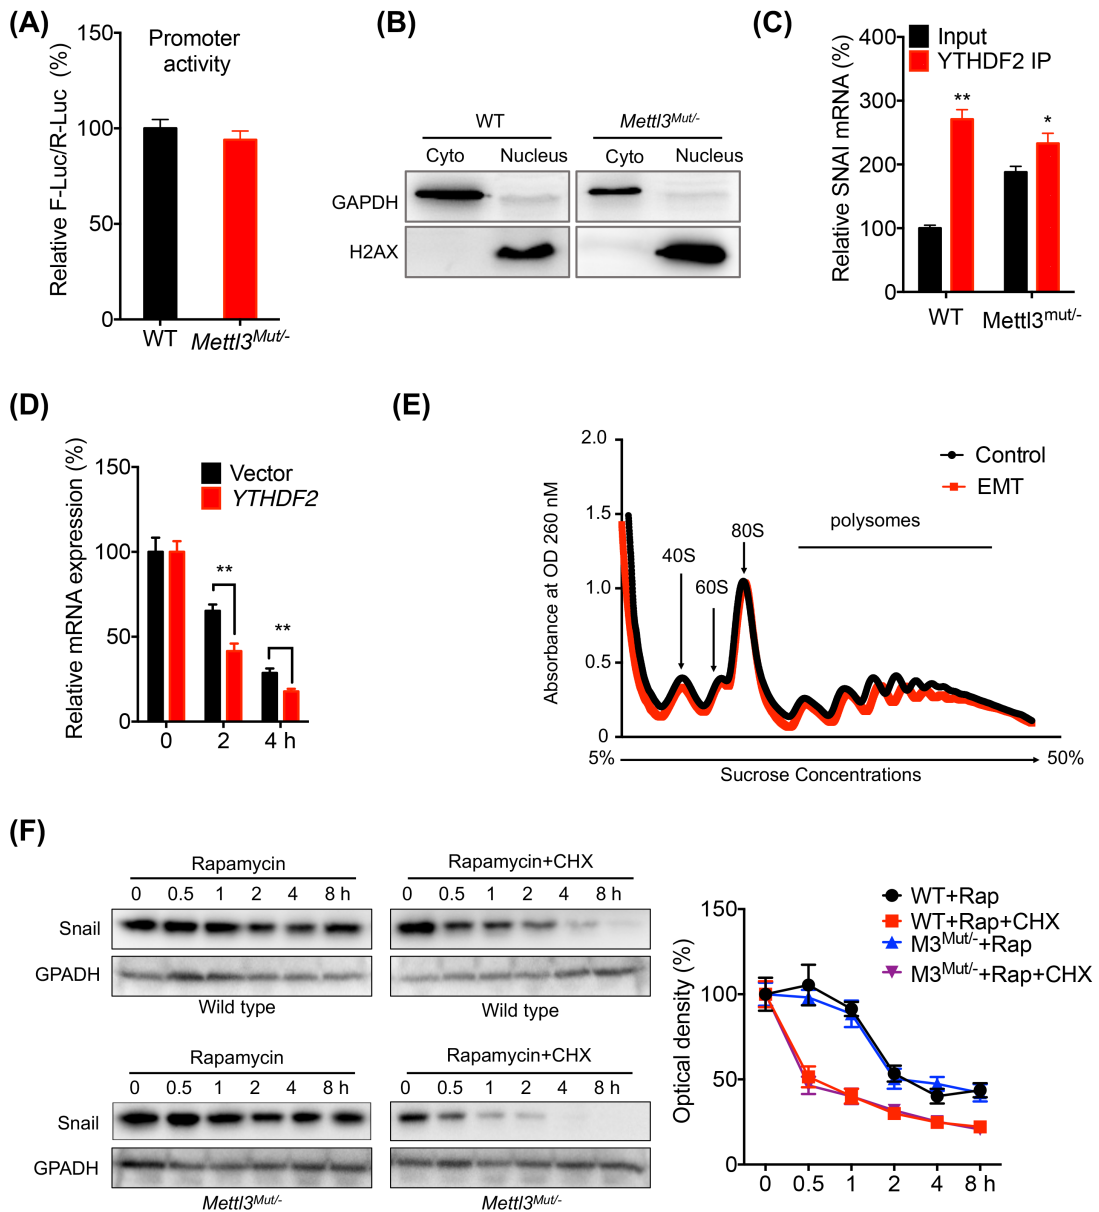

87

88 **Supplementary Figure 5 m<sup>6</sup>A triggers the translation of Snail mRNA in cancer cells.**

89 (A) Wild-type (WT) or *Mettl3<sup>Mut/-</sup>* cells were transfected with pGL3-Basic-Snail-luc reporter  
 90 and pRL-TK plasmid for 24 h. Results were expressed as the ratios between the activity of  
 91 the reporter plasmid and pRL-TK;

92 (B) The cytoplasmic and nuclear fractions of wild-type (WT) or *Mettl3<sup>Mut/-</sup>* cells were separated,  
 93 respectively,

94 (C) YTHDF2 RIP-qPCR analysis of SNAI1 mRNA in wild type or *Mettl3<sup>Mut/-</sup>* HeLa cells;

95 (D) HeLa cells were transfected with vector control or pcDNA/YTHDF2 for 24 and then further

96 treated with Act-D for 90 min, then then mature mRNA of Snail was analyzed at the  
97 indicated time periods;

98 (E) The polysome profiling of HeLa cells treated with or without 10 ng/ml TGF- $\beta$  for 3 days;

99 (F) Immunoblot of Snail1 expression in HeLa cells treated with 50 nM rapamycin  $\pm$   
100 cycloheximide (CHX, 100  $\mu$ g/ml).

101 Data are presented as means  $\pm$  SD from three independent experiments. \* $p$ <0.05, NS, no  
102 significant, by Student's  $t$  test.

103 Related to Figure 4

104

105

106 **Supplementary Figure 6**

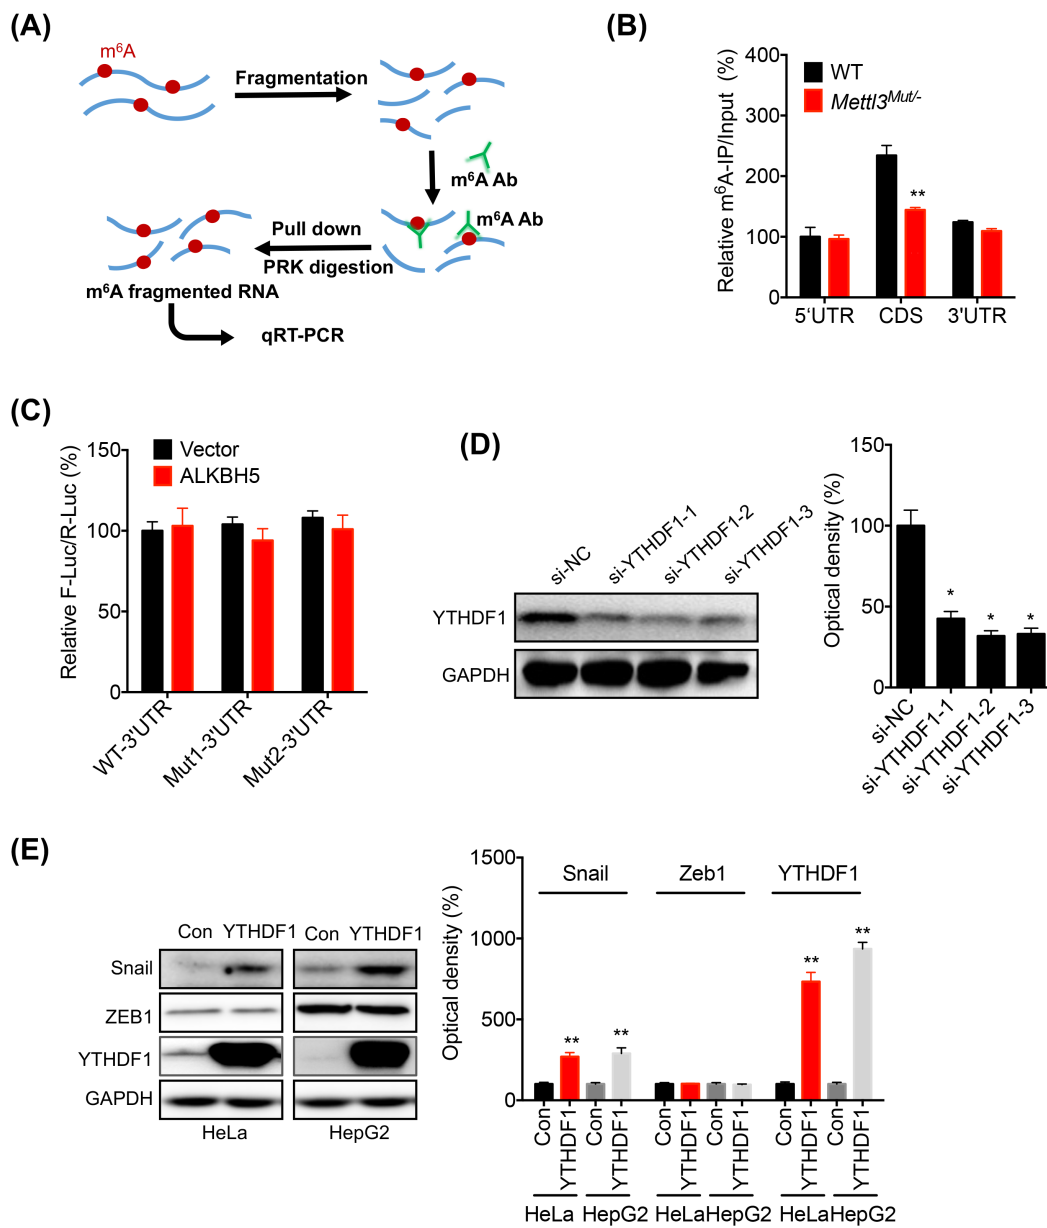

107

108 **Supplementary Figure 6 m<sup>6</sup>A methylation in CDS binding with YTHDF1 regulates the**  
 109 **expression of Snail.**

110 (A) Schematic representation of m<sup>6</sup>A RIP-PCR with fragmented RNA from cells;

111 (B) m<sup>6</sup>A RIP-qPCR analysis of SNAI1 mRNA in wild type or *Mettl3*<sup>Mut/-</sup> HeLa cells by using  
 112 fragmented RNA;

113 (C) HeLa cells were transfected with or without pmir-GLO-3'UTR or pmir-GLO-  
 114 3'UTR\_Mut1/2 and pcDNA/ALKBH5 for 24 h;

115 (D) HeLa cells were transfected with si-NC or si-YTHDF1-1~3 for 24 h. The si-YTHDF1-2  
116 was chosen for further studies because it showed the highest knockdown efficiency;

117 (E) HeLa or HepG2 cells were transfected with empty vector (Con) or pcDNA/YTHDF1 for  
118 24 h. Protein expression was detected by western blot analysis (*left*) and quantitatively  
119 analyzed (*right*).

120 Data are presented as means  $\pm$  SD from three independent experiments. \* $p < 0.05$ , \*\* $p < 0.01$ ,  
121 NS, no significant, by Student's *t* test.

122 Related to Figure 5

123

124

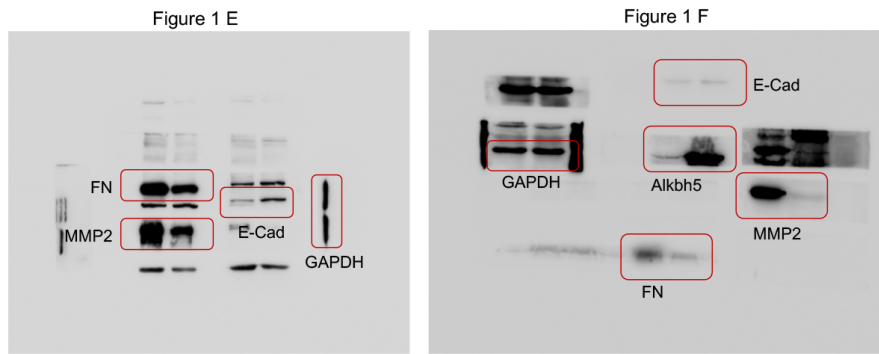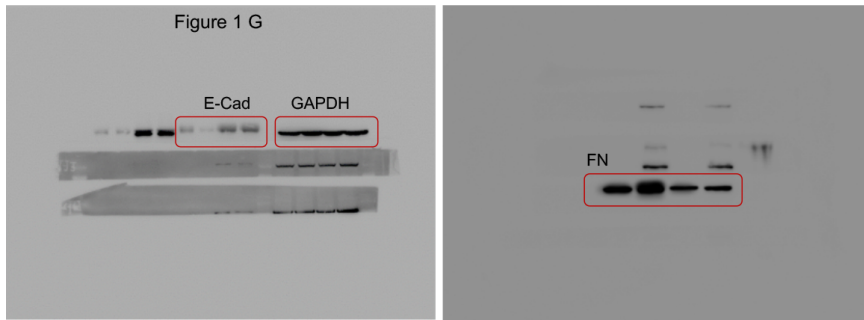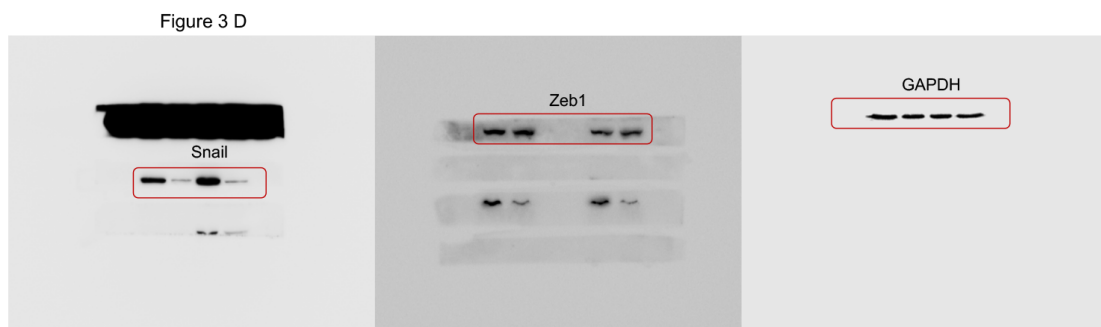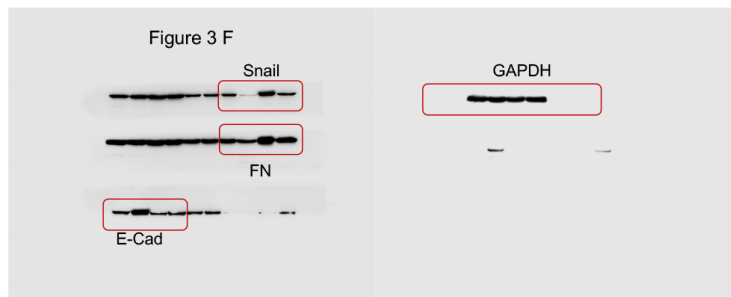

125

126 **Supplementary Figure 7 Uncropped images of western blot analysis.**

127

128

129

130

131

132

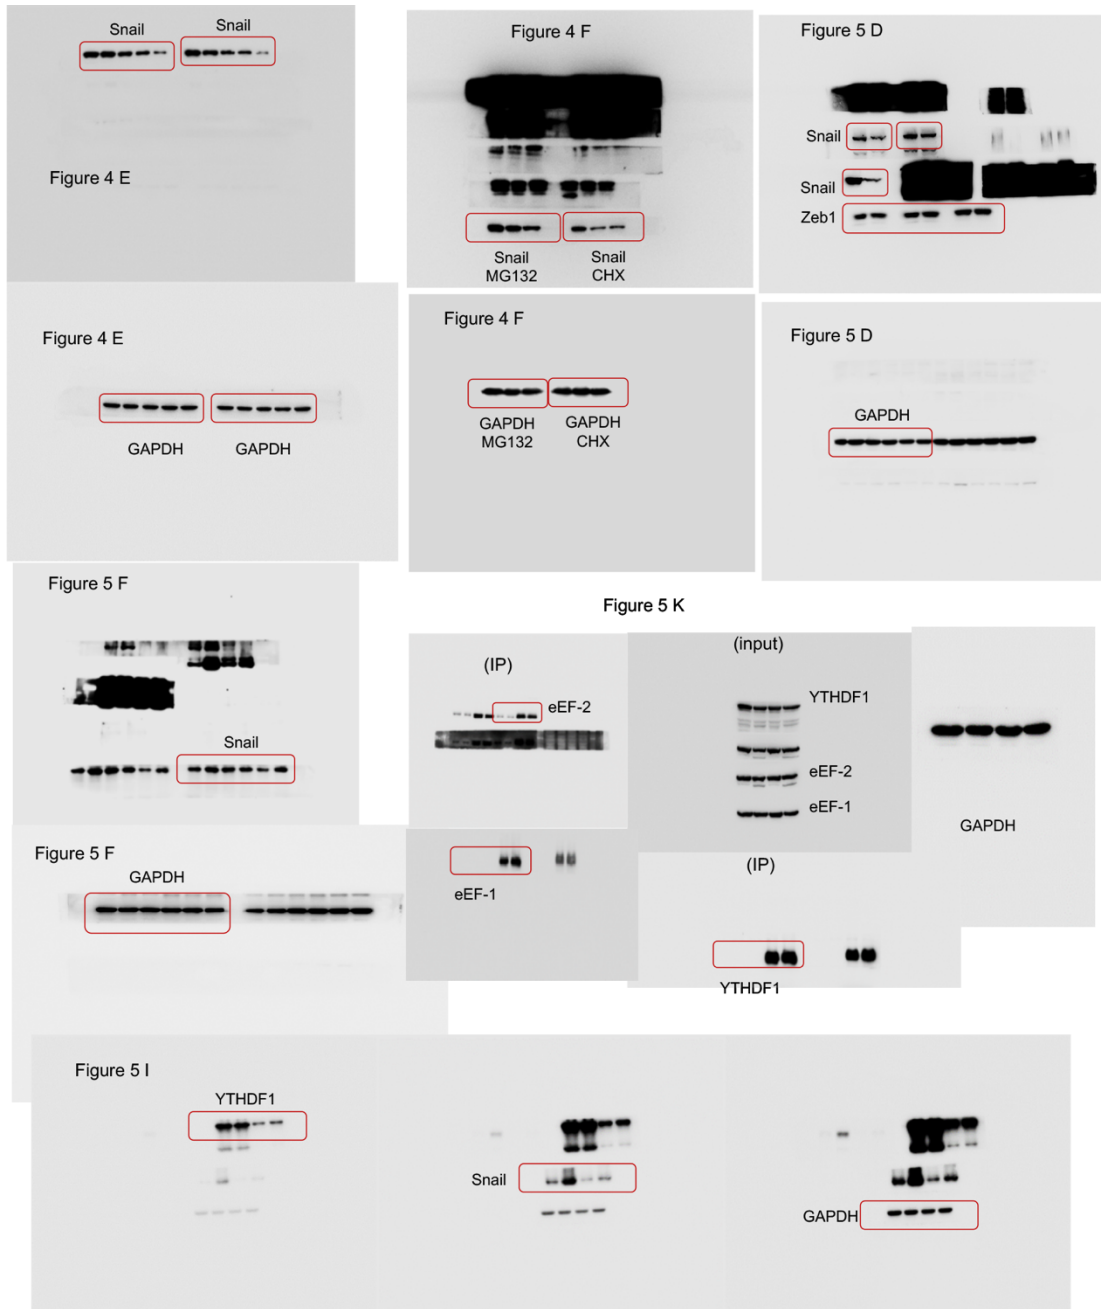

133

134 **Supplementary Figure 8 Uncropped images of western blot analysis.**

135

136

137

| <b>Catalog</b>                                                  | <b>Genes</b>                                                                                                                                                                                                                                                                                                                                                                                                                                                |
|-----------------------------------------------------------------|-------------------------------------------------------------------------------------------------------------------------------------------------------------------------------------------------------------------------------------------------------------------------------------------------------------------------------------------------------------------------------------------------------------------------------------------------------------|
| <b>Upregulated gene during EMT</b>                              | AHNAK, BMP1, CALD1, CAMK2N1, CDH2 (N-cadherin), COL1A2, COL3A1, COL5A2, FN1, FOXC2, GNG11, GSC, IGFBP4, ITGA5, ITGAV, MMP2, MMP3, MMP9, MSN, SERPINE1 (PAI-1), SNAI1, SNAI2, SNAI3, SOX10, SPARC, TCF4, TIMP1, TMEFF1, TMEM132A, TWIST1, VCAN, VIM, VPS13A, WNT5A, WNT5B.                                                                                                                                                                                   |
| <b>Upregulated gene during EMT</b>                              | CAV2, CDH1, DSP, IL1RN, KRT19, MITF, MST1R, NUDT13, OCLN, RGS2, SPP1, TFPI2, TSPAN13.                                                                                                                                                                                                                                                                                                                                                                       |
| <b>Differentiation &amp; Development</b>                        | AKT1, BMP1, BMP7, COL3A1, COL5A2, CTNNB1, DSP, ERBB3, F11R, FGFR2, FOXC2, FZD7, GSC, JAG1, KRT14, MST1R, NODAL, NOTCH1, PPP3R1, PTP4A1, SMAD2, SNAI1, SNAI2, SOX10, TGFB2, TGFB3, TMEFF1, TWIST1, VCAN, WNT11, WNT5A, WNT5B.                                                                                                                                                                                                                                |
| <b>Cell Morphogenesis</b>                                       | CTNNB1, FOXC2, JAG1, RAC1, SMAD2, SNAI1, SOX10, TGFB1, TGFB2, TGFB3, TWIST1, WNT11, WNT5A.                                                                                                                                                                                                                                                                                                                                                                  |
| <b>Cell Growth &amp; Proliferation</b>                          | AKT1, BMP1, BMP7, CAV2, CTNNB1, EGFR, ERBB3, FOXC2, IGFBP4, ILK, JAG1, MST1R, NODAL, PDGFRB, TGFB1, TGFB2, TGFB3, TIMP1, VCAN, ZEB1.                                                                                                                                                                                                                                                                                                                        |
| <b>Cell Migration &amp; Motility</b>                            | CALD1, CAV2, EGFR, FN1, ITGB1, JAG1, MSN, MST1R, NODAL, PDGFRB, RAC1, STAT3, TGFB1, VIM.                                                                                                                                                                                                                                                                                                                                                                    |
| <b>Cytoskeleton Regulators</b>                                  | CAV2, KRT7, MAP1B, PLEK2, RAC1, VIM.                                                                                                                                                                                                                                                                                                                                                                                                                        |
| <b>Extracellular Matrix (ECM) &amp; Cell Adhesion Molecules</b> | BMP1, BMP7, CDH1, CDH2 (N-cadherin), COL1A2, COL3A1, COL5A2, CTGF, CTNNB1, DSC2, EGFR, ERBB3, F11R, FGFR2, FN1, FOXC2, ILK, ITGA5, ITGAV, ITGB1, MMP2, MMP3, MMP9, PTK2, RAC1, SERPINE1 (PAI-1), SPP1, TGFB1, TGFB2, TIMP1, VCAN.                                                                                                                                                                                                                           |
| <b>Signal Transduction</b>                                      | Estrogen Receptors: CAV2.<br>Estrogen Receptor Signaling: ESR1 (ER $\alpha$ ), KRT19, TGFB3.<br>G-Protein Coupled Receptor Signaling: AKT1, FZD7, GNG11, RAC1, RGS2.<br>Integrin-Mediated Signaling: COL3A1, CTGF, ILK, ITGA5, ITGAV, ITGB1, PTK2.<br>Notch Signaling: FOXC2, JAG1, NOTCH1.<br>Receptor Tyrosine Kinase Signaling: EGFR, ERBB3, FGFR2, PDGFRB, RGS2, SPARC.<br>TGF $\beta$ / BMP Signaling: BMP1, BMP7, COL3A1, SMAD2, TGFB1, TGFB2, TGFB3. |
| <b>Transcription Factors</b>                                    | WNT Signaling: CTNNB1, FZD7, GSK3B, WNT11, WNT5A, WNT5B.<br>CTNNB1, ESR1 (ER $\alpha$ ), FOXC2, GSC, SMAD2, SNAI2, SNAI3, SOX10, STAT3, TCF3, TCF4, TCF7L1, TWIST1, ZEB1, ZEB2.                                                                                                                                                                                                                                                                             |
